# Supplementary material for: Elucidation of Functional Markers from Aspergillus nidulans Developmental Regulator FlbB and Their Phylogenetic Distribution
Source: PubMed Central journal article supplement (PMC3053368; doi:10.1371/journal.pone.0017505), 2011-03-10
Supplement: pone.0017505.s001.pdf [file pone.0017505.s001.pdf]

|       |                                                             |    |
|-------|-------------------------------------------------------------|----|
| Trees | -----HCFGASRAAMSSSLSPDH-AEGSTSRASTEgTDKGVLLS-----           | 38 |
| Tvire | -----FEASRAAMSSSLSPDH-AEGGTSRASTEgTDKGVLLS-----             | 36 |
| Tatro | -----MSSLSPDQ-IEGGASQASTEgTDKGVLLS-----                     | 28 |
| Vdahl | -----MASSLPSDQQGSASHARSSSAEQDNGPLSN-----                    | 30 |
| Moryz | -----MQSYEGS-----GGSDGGHDKSPLSS-----                        | 21 |
| Tterr | -----MASVSSNQPSQRSFGGGSSTTQDRPLLST-----                     | 29 |
| Ncras | -----MTSSLPLQP-LATYAEDPHSGPDSNPLST-----                     | 28 |
| Ntetr | -----MTSSLPLQP-LATYAEDPHSGPDSNPLST-----                     | 28 |
| Ndisc | -----MASLSFQP-LAPYAEDPHAGSDSNPLST-----                      | 27 |
| Foxys | -----MAAFNANLAGATERSFSSSLSPDRVVASSE-----                    | 30 |
| Fvert | -----MAAFNANLAGATERSFSSSLSPDRVVASSE-----                    | 30 |
| Fgram | -----MSVFNHLAGATERSFSSSLSPDRIIASSE-----                     | 30 |
| Sscle | -----MTSPSPENFDYTNRSRDRGDYASEQSEGAR-----                    | 29 |
| Ptrit | -----MAPTYPPPAGVNEYPSPAASRRPSECFSEMSMDSRRGSLAGFASD          | 46 |
| Snodo | MSHNRYSWSEGLTMGPVYPPPGAGADYPSPAASRRASECFSDMTH--SRRGSLAGFASE | 58 |
| Chete | -----MAATIKTDPVGDSSH-----                                   | 16 |
| Mfiji | -----MAAYTAGAHPMPHALPQPDQMRHDVSYD-----                      | 28 |
| Mgram | -----MTTFHA-AH-QPHGLSMSDGMSHDVGyDT-----                     | 27 |
| Abenh | -----                                                       |    |
| Tverr | -----MG-----                                                | 2  |
| Trubr | -----MASGAPQASPDANS--VPTGIDPp-----                          | 22 |
| Ttons | -----MASGAPQASPDANS--VPTGIDPp-----                          | 22 |
| Mgyps | -----MASSAPQSSPEANR--VPTGIEpAPELLIRScGGNKSA                 | 35 |
| Mcani | -----MGN--YPASINLGP-----                                    | 13 |
| Cimmi | -----MEPSGTNQGIMAGQSGVPVTQTLSSNVGSAPg-----                  | 32 |
| Cposa | -----MEPSGTNQGIMAGQSGVPVTQTFSSNVGSAPg-----                  | 32 |
| Pb-01 | -----MASFGQYGGGLASDK-----                                   | 14 |
| Pb-03 | -----MASFGQYGGGLASDK-----                                   | 14 |
| Aderm | -----MASLGHNGSPSNQ-----                                     | 14 |
| Afumi | -----MASMGGVMPVDY--GHTR-----                                | 17 |
| Nfisc | -----                                                       |    |
| Aclav | -----MYT-----                                               | 3  |
| Aflav | -----MASLNEGVLPLEA--DALNRQND-----                           | 22 |
| Aoryz | -----MASLNEGVLPLEA--DALNRQND-----                           | 22 |
| Anige | -----MTSINGGPMVDL--SAANRQTM-----                            | 22 |
| Aterr | -----MTAAMATMNGGVMPMDH--GTIDFNTLNG-----                     | 27 |
| Anidu | -----MTSISRPIPLDLNAMDSLNRQSLAQ-----                         | 26 |
| Pchry | -----                                                       |    |
| Pmarn | -----MSGYPSGGHTG--GMGYNDPYAQYGAISMFR-----                   | 30 |
| Tstip | -----MSSYPSGNQAAGMGIGYNDQFAR-----                           | 23 |

← B1

H93

|       |                                                            |     |
|-------|------------------------------------------------------------|-----|
| Trees | -----LNLNFFKSLSD-----KKVTRTGN--PPKRRGPKP                   | 66  |
| Tvire | -----LNLNFFKSLSD-----KKVTRTGN--PPKRRGPKP                   | 64  |
| Tatro | -----LNLNFFKSLSD-----KKVTRTGN--PPKRRGPKP                   | 56  |
| Vdahl | -----LNLGFLKGLTE-----KKATRDGQ--PPKRRGPKP                   | 58  |
| Moryz | -----IPSNFLRNLT-----KRTKSDAP--APKRRGPKP                    | 49  |
| Tterr | -----MNLDIRLRLTE-----KRTRRDGQ--PPKRRGPKP                   | 57  |
| Ncras | -----LNLTLKSLSD-----KK-TRDGQ--TPKRRGPKP                    | 55  |
| Ntetr | -----LNLTLKSLSD-----KK-TRDGQ--PPKRRGPKP                    | 55  |
| Ndisc | -----LNFTILQNLAD-----KK-TRDGQ--APKRRGPKP                   | 54  |
| Foxys | -----DDNTAASALDPDFYKSLTD-----KRTRRDGN--PPKRRGPKP           | 66  |
| Fvert | -----DDNAAASTLDPDFFKSLTD-----KRTRRDGN--PPKRRGPKP           | 66  |
| Fgram | -----DDNAAA--LDPEIYKSLAD-----KRTRRDGN--PPKRRGPKP           | 64  |
| Sscle | -----SPLSMGLFLKTLTER-----KSTRVDGS--TPKRRGPKP               | 62  |
| Ptrit | MESAGQWQSLGSDTKSPLAQFGFFKSLT-D-----KKTRRDGQ--PPKRRGPKP     | 92  |
| Snodo | MESTGQWQSIGSESKSPLAQFGFFKGLT-E-----KKTRRDGQ--PAKRRGPKP     | 104 |
| Chete | -----FNcSGSESKSPLAQFGFFKSLT-D-----KKTRRDGQ--PPKRRGPKP      | 56  |
| Mfiji | -----GQ-----PPKRRGPKP                                      | 39  |
| Mgram | -----NPPGSD-RSPLHDLGFYKNITPE-----KQTKDGQ--PAKRRGPKP        | 66  |
| Abenh | -----M-----KKSPSDGQGGQPKRRGPKP                             | 20  |
| Tverr | -----PPIVPI-KKPSLANLPFIRNFSDDL-----KKSPSDGQGGQPKRRGPKP     | 45  |
| Trubr | -----PPIVPI-KKPSLANLPFIRNFSDDL-----KKLPNDGQGGQPKRRGPKP     | 65  |
| Ttons | -----PPIVPI-KKPSLANLPFIRNFSDDL-----KKLPNDGQGGQPKRRGPKP     | 65  |
| Mgyps | SACIGPPPTVVK-KNPSLVNLAFIGKNSLDPV-----KKIPSDGQ--QPKRRGPKP   | 82  |
| Mcani | -----PPTVVK-KNPSLVNMSFLKNFNDPL-----KKV-TDEQRQPKRRGPKP      | 55  |
| Cimmi | -----DMTAPVSAESSFISMPFLKALGGGL-----QKKTRDGQ--PPKRRGPKP     | 74  |
| Cposa | -----DMTAPVSAESSFISMPFLKALGGGL-----QKKTRDGQ--PPKRRGPKP     | 74  |
| Pb-01 | -----NKKIENVVDVVDVDDF-----EKTTTRGQ--PPKRRGPKP              | 47  |
| Pb-03 | -----NTKNENADVVDVDD-----VGQ--PPKRRGPKP                     | 41  |
| Aderm | -----SSRNGAG--DQ-----EGQ--PPKRRGPKP                        | 36  |
| Afumi | -----GAPSQTSLKTPSTMNFFQFFGG-----QKKVTRDGQ--PAKRRGPKP       | 59  |
| Nfisc | -----MSTNFFQFFGG-----QKKVTRDGQ--PAKRRGPKP                  | 29  |
| Aclav | -----GAPSQTSIKTPSMGANFFQFFAG-----QKKVTRDGQ--PAKRRGPKP      | 45  |
| Aflav | -----LNGRQSQGLMK-ASMGTEWFRFFGSG-----QKKVTRDGQ--PAKRRGPKP   | 66  |
| Aoryz | -----LNGRQSQGLMK-ASMGTEWFRFFGSG-----QKKVTRDGQ--PAKRRGPKP   | 66  |
| Anige | -----PEAMPSPNSRP-STIGADFFKFFSGT-----QKKVTRDGQ--PAKRRGPKP   | 66  |
| Aterr | -----TNDRQSQSSLK--GADWFKFFGGG-----QKKVTRDGQ--PAKRRGPKP     | 67  |
| Anidu | -----SASPAGQDTPGMRGSIStDFKFFGAGGQ-----AKKTRRDGQ--PAKRRGPKP | 73  |
| Pchry | -----MVEEPQTPSSKGFGEIFKIFGGGSGSAASANGPKKATRDGQ--QPKRRGPKP  | 52  |
| Pmarn | -----LQENAPMYAPAPEPNKFNGFLKALGAG-----TKKTKDGQ--PAKRRGPKP   | 75  |
| Tstip | -----QYEAPEPEQTKFNGFLKALGAG-----TKKTKDGQ--PPKRRGPKP        | 63  |

\*:\*\*\*\*\*



**B2** 

|       |                                                     |     |
|-------|-----------------------------------------------------|-----|
| Trees | AHG-----SQQGFSPAG----TSHSTSMSP-----                 | 185 |
| Tvire | APG-----SQQGFSPVG----TSHSTSMSP-----                 | 180 |
| Tatro | AHG-----SQQGFSPGTG----MSQSTGMSMP-----               | 175 |
| Vdahl | THG-----SRSVFTPL-----TSKSTTASVSPSY-----             | 180 |
| Moryz | GGG--PA-----SSHTSAFTSP-----LASDTANSQQYSR-----       | 176 |
| Tterr | MAGSYIPA-----SSNTTALTPP-----LSASNG-SHGGGG-----      | 188 |
| Ncras | MLG-----SESYLPGGP-----SSQTTFPSPSS-----              | 178 |
| Ntetr | MLG-----SESYLPGGP-----SSQTTFPSPSS-----              | 179 |
| Ndisc | MLG-----SESYLPGGP-----SSQTTFPSPSS-----              | 178 |
| Foxys | TAP-----SVGSPMN-----LPVAVNQSTAG-----                | 186 |
| Fvert | TAP-----SVGSPMN-----LPVAVNQSTAG-----                | 183 |
| Fgram | TAP-----SVGSPMH-----LPPAVNQFVSG-----                | 185 |
| Sscl  | VPT-----SSSTFSPPP-----LSHSSNSNPNSMN-----            | 183 |
| Ptrit | GSA-----STGYTSPP-----TNGSASHDGMGGQ-----             | 217 |
| Snodo | GSA-----STGYTSPPSFQHRGSI SHDSMGQPP-----             | 232 |
| Chete | GSA-----STGYTSPP-----TRGSASHDGMSSQP-----            | 181 |
| Mfiji | ASE-----STGFSPPP-----PIVPGQMPMPQ-----               | 164 |
| Mgram | ASD-----SAGFSPTP-----DPIPG---MHQGG-----             | 187 |
| Abenh | PQIAPDL-----GSMNYLGTPEISIS---GRSPGTTT-----          | 158 |
| Tverr | PQIAPDI-----GSMNYLGTPEISIS---GRSPGTTT-----          | 183 |
| Trubr | SQTAPDI-----GNMNYLGTPEASIS---GRSPGTTT-----          | 203 |
| Ttons | SQIAPDI-----GNMNYLGTPEISIS---GRSPGTTT-----          | 203 |
| Mgyys | SQTAPDM-----ASMNYLGTPEISIS---GRSPGTTI-----          | 220 |
| Mcani | IQTAPDM-----GSMNYLGTPEISIS---GRSPGTTT-----          | 191 |
| Cimmi | SAGYP-----SGTHYMTPTDTTVA---GRSPGAPG-----            | 209 |
| Cposa | SAGYP-----SGTHYMTPTDTTVA---GRSPGAPG-----            | 209 |
| Pb-01 | S--QSHS-----QGFRGGDPPSATPSSIMS---AISPGTGS-----      | 191 |
| Pb-03 | S--QSHSHVPSHSHSQGFTGGGNPPTSTPSTIMS---AISPGTGS-----  | 193 |
| Aderm | APSQAPSAHSHSLSQGFLGDGTYPTATP-TTYS---TVSPGTGS-----   | 196 |
| Afumi | SOAP--AA-----LAASDGNNTYTPPTTVSNVSDVSPLANG-----MER   | 207 |
| Nfisc | SOAP--AA-----LAASDGNNTYTPPTTVSNVSDVSPLANG-----MER   | 177 |
| AcLav | SOQ---TG-----APTSNSHTATPPTTISTLSSDVSPLANG-----MER   | 189 |
| Aflav | SQPTAVAQ-----SVPSTQHAYTTPPTTISAPSSLSPIVNG-----IEH   | 217 |
| Aoryz | SQPTAVAQ-----SVPSTQHAYTTPPTTISAPSSLSPIVNG-----IEH   | 217 |
| Anige | SQPTGVAP-----SNPSTNNMYTTPPTTVA---SLSPITTG-----IEQ   | 211 |
| Aterr | SQPNQIA-----PSASNVYTPPTTVA---GVSPSVNGSTNGVDVSPTHVSN | 224 |
| Anidu | SQTG-----IASLTAHTYSTPPTTVSS---GMSPKFNG-----VEK      | 215 |
| Pchry | SQT---AP-----IAHSASNHDTPATTISS---GMSPGANG-----MDH   | 197 |
| Pmarn | SQSAG-----FQSQPAFLTTPSTFSS-----PHSAG-----DGDE       | 215 |
| Tstip | SQSAG-----FQSQPGFLTTPSTFSS-----PHSAG-----DGDD       | 205 |

 **B3**

**C236**

|       |                                                                         |     |
|-------|-------------------------------------------------------------------------|-----|
| Trees | -----DNRQLSPAA-----NGADLEQA-GIDFV                                       | 207 |
| Tvire | -----DNRQSPAG-----SGADLEQA-GIDFV                                        | 202 |
| Tatro | -----DNRQSPAG-----NGVDHEQA-GIDFV                                        | 197 |
| Vdahl | -----APNSGSSHGNTPSGQQQHQPHGTSOHLPGHYGLP <sup>C</sup> DDGVSGSRIRQLRGTARP | 235 |
| Moryz | -----TPTGHGSLSPHPGGHHQHTNAQHHPRHGA-----QPLNPGVDYEQAGIDFV                | 223 |
| Tterr | -----GMSPHSAAYSHGGHHQHPVQGNPSAGAGV---GSHPNQNLNLDYEQAGIDFV               | 239 |
| Ncras | -----TTTSPAYRPLGGPRDFNTVLG---DGAG---VMVSKRDPDLDYDQAGIDFV                | 224 |
| Ntetr | -----TTTTSPVYRPLGGPRDFNTVLG---DGAG---GLVSKRDPDLDYDQAGIDFV               | 225 |
| Ndisc | -----TTTTSPFYRPLGGPSDFNTILG---DGAG---VLAPKRNPDLDYDQAGIDFV               | 225 |
| Foxys | -----QPHGMPQPLYR-----GNPELEQA-GIDFV                                     | 210 |
| Fvert | -----QPHGMPQPLYR-----GNPELEQA-GIDFV                                     | 207 |
| Fgram | -----QPHGMPQPLYR-----GNPELEQA-GIDFV                                     | 209 |
| Sscl  | -----YDTESPIGGANGVYNGNDRSMAQ-----QQVRGVDYDQAGIDFV                       | 223 |
| Ptrit | -----MTLQQQ-----AQPNHHQH-----NGLDYDQI-GIDFV                             | 245 |
| Snodo | -----MALQQQ-----QVHQSGPQ-----NGLDYDQI-GIDFV                             | 260 |
| Chete | -----LTLQHQ-----AQQQHHHQ-----QGLDYDQI-GIDFV                             | 210 |
| Mfiji | -----IQNMQA-----GMVRNMAQMPS-----NRLDYDSI-GIDFV                          | 194 |
| Mgram | -----MAPPQS-----MPMRNMAQLPN-----NRLDYDQI-GIDFV                          | 217 |
| Abenh | SEMAQLPATGSNNPYFESAIPVAATGNALSSSDTG-GGSALVSSTPGVFDVDPQLGIDFV            | 217 |
| Tverr | SEMAQLPATGSNNPYFESAIPVAATGNALSSSDTG-GGSALVSSTPGVFDVDPQLGIDFV            | 242 |
| Trubr | SEMAQLPAVGSNNPYFESAIPVPATGNALSSSDIG-GGSALVSSTPGVFDVDPQLGIDFV            | 262 |
| Ttons | SEMAQLPAAGSNNPYFESAIPVPATGNALSSSDIG-GGSALVSSTPGVFDVDPQLGIDFV            | 262 |
| Mgyys | SEMAQPTAGSNNPYFESATPLPGTYNTSSNSIG-GGTALVSSTPGVFDVDPQLGIDFV              | 279 |
| Mcani | SETVQPTAGSNNPYFESAAPQPGVSYQLSSNGFG-GESALVSSTPGVFDVDPQLGIDFV             | 250 |
| Cimmi | SDFADAQPTSSPYSGPKTKQKSCQPAISSEISIPSGDNSTVADIPGIFDRDPQLGIDFI             | 269 |
| Cposa | SDFADAQPTSSPYSGPKTKQKSCQPAISSEISIPSGDNSTVADIPGIFDRDPQLGIDFI             | 269 |
| Pb-01 | DSTETQPGGNMPLYSESQGHQKEQSGVLAESSWGGDGTAVDDVPGIFEKDPQLGVDFI              | 251 |
| Pb-03 | DSTETQPGGNMPLYSESQGHQKEQSGVLAESSWGGDGTAVDDVPGIFEKDPQLGVDFI              | 253 |
| Aderm | DYTDQPGSGNIFTSYSGSQIQSEQPGVLGESSAWGGDSSVDDLPGIFEKEPELGVFEV              | 256 |
| Afumi | VEISPTHEITPPPIAMT-ASSCEIPADLDL-SAIARNQEPVQAVGGVFEADPQLQIDFI             | 265 |
| Nfisc | VEISPHEITPPPIAMTASSCEIPANLDL-SAIARNQEPVQAVGGVFEVDPQLQIDFI               | 236 |
| AcLav | VEISPSQEIPTPP--QSHHAGSCDIPANLDL-SAIARNIEPIQALGGVFETDPQLQVDFI            | 246 |
| Aflav | IDVSPTELSQPH--QNYSAAPCDALATLDR-IAPA-SRQPNQPPG-IFENDPQLQIDFI             | 272 |
| Aoryz | IDVSPTELSQPH--QNYSAAPCDALATLDR-IAPA-SRQPNQPPG-IFENDPQLQIDFI             | 272 |
| Anige | IDVS-SSEMSPQ--GPYQAAPCDALATLDR-IAPV-SRAPRQPSG-IFEELPQLQIDFI             | 265 |
| Aterr | IDISPTQEIIPPQ--VAYNHAPCDALALDR-IAPS-NRKNQPPG-VFEEDPQLQIDFI              | 279 |
| Anidu | FDSSVDPVGNP--QGATVPCDALAALD-----RRPPIQAG-IFEDNPQLQIDFI                  | 265 |
| Pchry | SDMSPPIGYPSHQ--QVYHANAGEHSMRMDPSCAPVDTMQMPAKGGVFESDPQLQVDFI             | 255 |
| Pmarn | RSGRAGPGGG-MPIIGTTFTQGMGLSELDGSGSEKERELLPSIPGIFEDDPQLGVDFI              | 274 |
| Tstip | RAGRSRGTGGAMPMTGTSFQTMNGLDLDYSASSEKD-QAIPAVPGIFEDDPQLGIDFI              | 264 |

|       | B3                                                | B4                 |             |     |
|-------|---------------------------------------------------|--------------------|-------------|-----|
|       | C272                                              | C280               |             |     |
|       | C303                                              |                    |             |     |
| Trees | LTLERPCMAHMPFLVDRASDADG                           | -----APCGHALMAS    | CPPTPFQDLTP | 251 |
| Tvire | LTLLEKPCMAHMPFLVDRASDADG                          | -----APCGHALMAS    | CPAPFQDLTQ  | 246 |
| Tatro | LTLLEKPCMAHMPFLVDRASDADG                          | -----APCGHALMAS    | CPAPFQELTP  | 241 |
| Vdahl | MTLLEKPCMNHPWLLERSSEMGG                           | -----EPCGHALMAS    | CPPEPFELTP  | 279 |
| Moryz | LAYENPHE-----KQRTGETGG                            | -----EACGHALMAS    | CPPEPFSELTP | 261 |
| Tterr | LTLLEKPCMNHLPWMLERNSETGGR                         | -----EPCGHALMAS    | CPQPFSQLSS  | 284 |
| Ncras | LTLLEKPCMEHMTWLLERGTGTEDRA                        | -----QREPCGHALMAS  | CPPEPFSELSP | 272 |
| Ntetr | LTLLEKPCMEHMTWLLERGTGTEDRA                        | -----QREPCGHALMAS  | CPPEPFSELSP | 273 |
| Ndisc | LTLLEKPCMEHMTWLLERGTGTEDRA                        | -----QREPCGHALMAS  | CPPEPFSELSP | 273 |
| Foxys | LTLLEKPCMTHIQFMVERASEPEG                          | -----EPCGHALMAS    | CPDPAPETRTP | 254 |
| Fvert | LTLLEKPCMTHIQFMVERASEPEG                          | -----EPCGHALMAS    | CPDPAPETRTP | 251 |
| Fgram | LTLLEKPCMTHIQFMVERASEPEG                          | -----EPCGHALMAS    | CPDPSPESRP  | 253 |
| Sscl  | LTLLEKPCMDHMQLVVERSSDVG                           | -----EFFSGHALMAT   | CPPESDMDMHP | 268 |
| Ptrit | LTLLEKPCMDHMQLMVRRAHEAD                           | -----DNISGHALMAT   | APPDAHITNCP | 289 |
| Snodo | LTLLEKPCMDHMQLMVRRAHDAE                           | -----ETISGHALMAT   | APPDSHIAQCP | 304 |
| Chete | LTLLEKPCMDHMQLMVRRAHDAD                           | -----ENISGHALMAT   | APPDAHITNCP | 254 |
| Mfiji | LTLLEKPCMDHMQLMVRSYNPDGKEFNHPMENPDDTEHDHMSGHALMAT | AAAPYSHIMHKP       | 254         |     |
| Mgram | LTLLEKPCMDHMQLMVRRAHDAE                           | -----ETISGHALMAT   | APPDSHIAQCP | 277 |
| Abenh | LHLEKPCNWHLEFICRR--AHDD                           | -----NQEAVSGHSLMAT | CPTSSVIANTE | 263 |
| Tverr | LHLEKPCNWHLEFICRR--AHDD                           | -----NQEAVSGHSLMAT | CPTSSVIANTE | 288 |
| Trubr | LHLEKPCNWHLEFICRR--AHDD                           | -----NQEAVSGHSLMAT | CPTSSVIANTK | 308 |
| Ttons | LHLEKPCNWHLEFICRR--AHDD                           | -----NQEAVTGHSLMAT | CPTSSVIANTE | 308 |
| Mgyys | LHLEKPCNWHMEFLCRR--AHDD                           | -----NQEAVSGHSLMAT | CPTSSVIANTE | 325 |
| Mcani | LHLEKPCNWHMEFLCRR--AHDD                           | -----NQEAVSGHSLMAT | CPTSSVIANTE | 296 |
| Cimmi | LTLLEKPCRDHIERLCRR--AHDAE                         | -----DQDMVAGHILMAT | CPPPSVVASAS | 315 |
| Cposa | LTLLEKPCRDHIERLCRR--AHDAE                         | -----DQDMVAGHILMAT | CPPPSVVASAS | 315 |
| Pb-01 | LSLEQSCRDHMEFLCRR--AEDD                           | -----EHETISGHVLMAS | CPPPTQIVSAE | 297 |
| Pb-03 | LSLEQSCRDHMEFLCRR--AEDD                           | -----EHETISGHVLMAS | CPPPTQIVSAE | 299 |
| Aderm | LSLEQSCRDHMEFLCRR--AEDD                           | -----ETETISGHVLMAS | CPPPTQIVSTE | 302 |
| Afumi | LTLLEKPCREHTDYLCRRSITTEADD                        | -----EDMPFSGHALMAT | CPPPSYIANTT | 313 |
| Nfisc | LTLLEKPCREHTDYLCRRSITTEADD                        | -----EDMPFSGHALMAT | CPPPSYIANTT | 284 |
| Aclav | LTLLEKPCREHTDYLCRRSITTEADD                        | -----EDMPFSGHALMAT | CPPPSYIANTT | 294 |
| Aflav | LTLLEKPCREHTDYLCRRSITTEADD                        | -----EDMPFSGHALMAS | CPPPSYIANTT | 320 |
| Aoryz | LTLLEKPCREHTDYLCRRSITTEADD                        | -----EDMPFSGHALMAS | CPPPSYIANTT | 320 |
| Anige | LTLLEKPCREHTDYLCRRSITTEADD                        | -----EDMPFSGHALMAT | CPPPSYIANTS | 313 |
| Aterr | LTLLEKPCREHTDYLCRRSITTEADD                        | -----EDMPFSGHALMAT | CPPPSYIANTT | 327 |
| Anidu | LTLLEKPCRDHTEYLCREASKDVE                          | -----EDMPFSGHALMAT | CPPPSYIANTT | 313 |
| Pchry | LTLLEKPCRDHTEYLCREASKDVE                          | -----EDMPFSGHALMAT | CPPPSYIAKTT | 303 |
| Pmarn | LKLEAPCRVHTEYLCREASKDVE                           | -----RDAFISGHALMAS | CPPPSHIENVP | 321 |
| Tstip | LKLEAPCRVHTEYLCREASKDVE                           | -----RDRFISGHALMAS | CPPPSHIENVP | 311 |
| :     | *                                                 |                    | ** **       | ..  |

|       | B4                                                         |     |
|-------|------------------------------------------------------------|-----|
| Trees | DTPFGHTHTHHGD-----GDDGGEEPLTQG----                         | 277 |
| Tvire | ETPFNGTHTHDHG-----GEFHPQSQG----                            | 268 |
| Tatro | DTPFGSKHTHDHG-----GEFEK--QG----                            | 261 |
| Vdahl | DIPFG--YAHVNG-----DLNS-GQR----                             | 297 |
| Moryz | DIPFGYSN-----VKNGELDSGQR----                               | 280 |
| Tterr | DIPF5HHQHQL-----HQPQQQAQQQRLLDSQNNNNNT                     | 317 |
| Ncras | ESPFGHTNTIH-----AHAGHPPMPTSISGGGQR----                     | 302 |
| Ntetr | ESPFGHTNTIH-----AHGHHGPPMPTSISGGGQR----                    | 303 |
| Ndisc | ESPFGHNTIQNLAIIGGNSNGDGGAITPIRQQHVHTHGHDYPPMPTSISGGGQR---- | 329 |
| Foxys | GLPFGKTHIPLDG-----DTNQK----                                | 272 |
| Fvert | GLPFGKTHIPLDG-----DTNQK----                                | 269 |
| Fgram | GLPFGKIHIPVDG-----EPSQK----                                | 271 |
| Sscl  | HIPFGHCPMHNHN-----HETDGTDDGGPPKQK----                      | 295 |
| Ptrit | EEKYPHOMP-----                                             | 298 |
| Snodo | EEKYPHOMP-----                                             | 313 |
| Chete | EEKYPHOMP-----                                             | 263 |
| Mfiji | TEKYPHOMPE-----                                            | 264 |
| Mgram | AEPYPHOMPE-----                                            | 287 |
| Abenh | RGQTYETKT-----                                             | 272 |
| Tverr | RGQTYETKT-----                                             | 297 |
| Trubr | RGQTYETKT-----                                             | 317 |
| Ttons | RGQTYETKT-----                                             | 317 |
| Mgyys | RGQTYVTKT-----                                             | 334 |
| Mcani | RGQTYTTKT-----                                             | 305 |
| Cimmi | RGYEYPVKT-----                                             | 324 |
| Cposa | RGYEYPVKT-----                                             | 324 |
| Pb-01 | PGQMYSTRT-----                                             | 306 |
| Pb-03 | PGQMYSTRT-----                                             | 308 |
| Aderm | PGQMPVRT-----                                              | 311 |
| Afumi | PEQAYPHKT-----                                             | 322 |
| Nfisc | PEQAYPHKT-----                                             | 293 |
| Aclav | AEQTYPHKT-----                                             | 303 |
| Aflav | HEQAYPHQT-----                                             | 329 |
| Aoryz | HEQAYPHQT-----                                             | 329 |
| Anige | NEQTYPHKT-----                                             | 322 |
| Aterr | DKQVYPHKT-----                                             | 336 |
| Anidu | SEQTYPHKT-----                                             | 322 |
| Pchry | PEQPYPHKA-----                                             | 312 |
| Pmarn | EGNLYPHQT-----                                             | 330 |
| Tstip | EGNLYPHQT-----                                             | 320 |

|       |                                              | B4                  | (C354) |
|-------|----------------------------------------------|---------------------|--------|
| Trees | -----TWELTKADLTLLDLSQKLN-----                | LDGEITPVMAWGMVLS    | 313    |
| Tvire | -----TWELTKADLSTLLDLSRKLN-----               | LDGEITPVMAWGMVLS    | 304    |
| Tatro | -----TWELTKADLTLLDLSQKLN-----                | LDGEITPVMAWRMVTS    | 297    |
| Vdahl | -----TWELSKADLGTLLALSRLN-----                | LDGEITPVMAWGMVMA    | 333    |
| Moryz | -----TWELSKGDLNLTLLDLSKRLN-----              | LDGEITPVMAWGMVLA    | 316    |
| Tterr | TNDSNYNVNIDNDGSSTPGTWTLNKGDLATLLDLSRRLN----- | LDGEITPVMAWGMVLA    | 372    |
| Ncras | -----TWELSKADLATLLDLSKRLD-----               | LDGEITPVMAWGMILA    | 338    |
| Ntetr | -----TWELSKADLATLLDLSKRLD-----               | LDGEITPVMAWGMVLA    | 339    |
| Ndisc | -----TWELSKADLATLLDLSKRLD-----               | LDGEITPVMAWGMVLA    | 365    |
| Foxys | -----TWEVPKADLATLLDLSKSID-----               | LDGEVTPIMSWGMLMS    | 308    |
| Fvert | -----TWEVPKADLATLLDLSKSID-----               | LDGEVTPIMSWGMLMS    | 305    |
| Fgram | -----TWEVPKADLATLLDLSKSID-----               | LDGEVTPIMSWGILMS    | 307    |
| Sscl  | -----TWDLSKSDLANLLDLSKRLD-----               | LNGEITPVMAWGMVLA    | 331    |
| Ptrit | -----DVKMPDLMKLLDLSNRLP-----                 | LDGEITPIMAWAKIIQ    | 332    |
| Snodo | -----DITMPDLMKLLDLSNRLP-----                 | LDGEITPIMAWAKIIQ    | 347    |
| Chete | -----DVNMPDLMKLLDLSNRLP-----                 | LDGEITPIMAWAKILQ    | 297    |
| Mfiji | -----DLDNPTLVKLLDLSNRLP-----                 | LDHQGEITPIMAWAKLIYL | 300    |
| Mgram | -----EMSPALGKLLDLSRRLPRNMYDREGIETPIMAWAMIFG  |                     | 326    |
| Abenh | -----YDLPPANLNTLLNLSKQLVT-----               | DDEITPIMALQLLRN     | 307    |
| Tverr | -----YDLPPANLNTLLNLSKQLVT-----               | DDEITPIMALQLLRN     | 332    |
| Trubr | -----YDLPPANLNTLLNLSKQLVT-----               | DDEITPIMALQLLRN     | 352    |
| Ttons | -----YDLPPANLNTLLNLSKQLVT-----               | DDEITPIMALQLLRN     | 352    |
| Mgyps | -----YDLPPANLNTLLNLSRQLVT-----               | DDEITPIMALQLLRN     | 369    |
| Mcani | -----YDLPPVNLNTLLNLSKQLVT-----               | DDEITPIMALQLLRS     | 340    |
| Cimmi | -----YDLPPANLNTLLNLSRQLVT-----               | DNEITPIMALQSLKN     | 359    |
| Cposa | -----YDLPPANLNTLLNLSRQLVT-----               | DNEITPIMALQSLKN     | 359    |
| Pb-01 | -----YDLPHANLTALLNLSRQLVT-----               | GGQITPIMALQYLKS     | 341    |
| Pb-03 | -----YDLPHANLTALLNLSRQLVT-----               | GGQITPIMALQYLKS     | 343    |
| Aderm | -----YDLPHSNLTRLNLSRQLVT-----                | DGQITPIMALQYLKS     | 346    |
| Afumi | -----YDLPHANLTLLNLSRQLVT-----                | EGQITPIMALQCLKN     | 357    |
| Nfisc | -----YDLPHANLTLLNLSRQLVT-----                | EGQITPIMALQCLKN     | 328    |
| AcLav | -----YDLPHANLTLLNLSRQLVT-----                | EGQITPIMALQCLKN     | 338    |
| Aflav | -----YDLPHANLTLLNLSRQLVT-----                | DGQITPIMALQCLKN     | 364    |
| Aoryz | -----YDLPHANLTLLNLSRQLVT-----                | DGQITPIMALQCLKN     | 364    |
| Anige | -----YDLPHANLSTLLNLSRQLVT-----               | DGQITPIMALQCLKN     | 357    |
| Aterr | -----YDLPLANLSTLLNLSRQLVT-----               | DGQITPIMALQHLKN     | 371    |
| Anidu | -----YDLPHANLTLLNLSRQLVT-----                | EGQVTPIMALQALKN     | 357    |
| Pchry | -----PDLPHANLSTLLNLSRQLVT-----               | EGQITPIMALQCLKN     | 347    |
| Pmarn | -----YDLPLPNLGKLLNLSKQLIT-----               | EGQVTPIMILQSLKN     | 365    |
| Tstip | -----YELPLPNLEKLLNLSKQLIT-----               | DGQVTPIMILQSLKN     | 355    |
|       | : * * * * :                                  | : : * * * :         |        |

|       |                             | B4                     |                                     |                      |                      |                      |                  |
|-------|-----------------------------|------------------------|-------------------------------------|----------------------|----------------------|----------------------|------------------|
| Trees | HARFAELAPD                  | FEKISGELLRKVRCYGF      | GAVLEEFELRDAIENIFSGRPEA-----MVF 367 |                      |                      |                      |                  |
| Tvire | HSRFAEL                     | ESGDFEKLSEELLRKVRCYGF  | GAVMEEFELRDAIENIFSGRPEA-----MVF 358 |                      |                      |                      |                  |
| Tatro | HYRFNELAP                   | GDLEKLSEELLRKVRCYGF    | GAVMEEFELRDAIENIFSGRPEA-----MVF 351 |                      |                      |                      |                  |
| Vdahl | HSRIFYEM                    | KAEDFAKLTTEELSTKIRCYGF | GAVLEEFELRDAIENAMGAYP----- 382      |                      |                      |                      |                  |
| Moryz | HPRLGEM                     | TPKDFKFLTEELCGK        | VRCYGF                              | GAVMEFEARDAIENVSTKPD | SFHQSYSTEY 376       |                      |                  |
| Tterr | HPRLGEL                     | RAEDFARLAEELLGK        | VRCYGF                              | GAVLEEFVDRDAIENFSTK  | PD-----FTGY 427      |                      |                  |
| Ncras | HPRLAEL                     | QLEDFARLTEELGSK        | VRCYGF                              | GAVMEEFVDRDAIENFSTK  | PDG---RVFEDF 395     |                      |                  |
| Ntetr | HPRLAEL                     | QLEDFARLTEELGSK        | VRCYGF                              | GAVMEEFVDRDAIENFSTK  | PDG---RVFEDF 396     |                      |                  |
| Ndisc | HPRLAEL                     | QLEDFARLTEELGRK        | VRCYGF                              | GAVMEEFVDRDAIENFSTK  | PDG---RVFEDF 422     |                      |                  |
| Foxys | HPRANELE                    | AVDFRKLSEELVRK         | VRCYGF                              | GAVMEEFVDRDAIDNVFSGK | DTMMGE----- 362      |                      |                  |
| Fvert | HPRANELE                    | VDFRKLSEELVRK          | VRCYGF                              | GAVMEEFVDRDAIDNVFSGK | DSMMGE----- 359      |                      |                  |
| Fgram | HPRANELE                    | AADFRLKSEDLVRK         | VRCYGF                              | GAVMEEFVDRDAIDNVFSGK | DGMMYE----- 361      |                      |                  |
| Sscl  | HPRFL                       | ELKEEDFKMSAELL         | PKVRCYGF                            | GALEEFVDRDAIENFSGAEL | VHMSI----- 386       |                      |                  |
| Ptrit | NENFRTL                     | SKEDIELMKGELLAK        | VRCYGF                              | GAVLEEFVSDALMTVLAKG  | FSNG-ATPLA-- 389     |                      |                  |
| Snodo | DANFQD                      | LTKDEIEVKTTELLAK       | VRCYGF                              | GAVLEEFVSDALMTVLAKG  | YSNGNPTPTA-- 405     |                      |                  |
| Chete | HDKLRD                      | LTKEDFELIKGELLAK       | VRCYGF                              | GAVLEEFELRDAITTVLAGK | FSNG-SPPIG-- 354     |                      |                  |
| Mfiji | NERVRD                      | LSKDFDRMKTDLATK        | VRCYGF                              | GAVLEEFVDRDALDGLAEK  | DGQMPALDQKM 360      |                      |                  |
| Mgram | HERVNE                      | LVEEDVERVKKGL          | EGKVR                               | CYGF                 | GAVVEEFVDRDAIAAVFNDK | DSVMRG----- 380      |                  |
| Abenh | HDAYPYL                     | TREDIAHIMS             | DLAAKVRCYGF                         | GAVLENFEVMSLNSVLT    | SKMDYAIAS-C 366      |                      |                  |
| Tverr | HDAYPYL                     | TREDIAHIMS             | DLAAKVRCYGF                         | GAVLENFEVMSLNSVLT    | SKMDYAIAS-C 391      |                      |                  |
| Trubr | HDAYPYL                     | TREDVAHIMS             | DLAAKVRCYGF                         | GAVLENFEVMSLNSVLT    | SKMDYAIAS-Y 411      |                      |                  |
| Ttons | HDAYPYL                     | TREDVAHIMS             | DLAAKVRCYGF                         | GAVLENFEVMSLNSVLT    | SKMDHAIAS-Y 411      |                      |                  |
| Mgyps | HEAYPYL                     | TREDVAHIMS             | DLAAKVRCYGF                         | GAVLENFEVMSLNSVLT    | SKMDYAIAS-Y 428      |                      |                  |
| Mcani | HEAYPYL                     | TREDVTNM               | MDDLAAKVRCYGF                       | GAVLENFEVMSLNSVLT    | SKMDYAFAS-P 399      |                      |                  |
| Cimmi | HEMYHLL                     | TKDDIRRV               | MDDLVAKVR                           | CYGF                 | GAVLEEFVDRDAIENFVSD  | ALMTVLAKGFSNG-A 417  |                  |
| Cposa | HEMYHLL                     | TKDDIRRV               | MDDLVAKVR                           | CYGF                 | GAVLEEFVDRDAIENFVSD  | ALMTVLAKGFSNG-A 417  |                  |
| Pb-01 | HDTYPSL                     | TREDVRRH               | MDDLNGKIR                           | CYGF                 | GAVMEFEFMDSFSSVLARK  | MEPMDTGPDDL 401      |                  |
| Pb-03 | HDTYPSL                     | TREDVRRH               | MDDLNGKIR                           | CYGF                 | GAVMEFEFMDSFSSVLARK  | MEPMDTGPDDL 403      |                  |
| Aderm | HDMYPSL                     | TREDVEN                | MDDLNGKIR                           | CYGF                 | GAVLEDFEFMDSFSSVLASK | LKSLIDTAPDDP 406     |                  |
| Afumi | HEL                         | YRTLTKDDVKII           | IETLNTKVR                           | CYGF                 | GAVVEDFELMDCLSSV     | LGSKVDT----- 409     |                  |
| Nfisc | HEL                         | YRTLTKDDVKII           | IETLNTKVR                           | CYGF                 | GAVVEDFELMDCLSSV     | LGSKVDTR----- 380    |                  |
| AcLav | HDMYRNL                     | TKDDVKII               | IDTLNTKVR                           | CYGF                 | GAVVEDFELMDCLSSV     | LGSRVGPG----- 390    |                  |
| Aflav | HEMYRSL                     | TRDDVKII               | IETLNTKVR                           | CYGF                 | GAVVEDFELMDCLSSV     | VGSRVDMG----- 416    |                  |
| Aoryz | HEMYRSL                     | TRDDVKII               | IETLNTKVR                           | CYGF                 | GAVVEDFELMDCLSSV     | VGSRVDMG----- 416    |                  |
| Anige | HEL                         | YRSLTKEDVKII           | IETLNTKVR                           | CYGF                 | GAVVEDFELMDCLSSV     | LGSKVEGA----- 409    |                  |
| Aterr | HEL                         | YRTLTKDDVKII           | IETLNTKVR                           | CYGF                 | GAVVEDFELMDCLSSV     | LGGKVDVG----- 423    |                  |
| Anidu | HEMYTKL                     | TRDDVKII               | IMDTLENKVR                          | CYGF                 | GAVLEDFELMDCLSSV     | LGSKVEGSGPV----- 412 |                  |
| Pchry | HEL                         | YPTLR                  | RRDDIKII                            | IDTLNTKVR            | CYGF                 | GAVVEDFELIDCLSSV     | LGTKVDL----- 399 |
| Pmarn | HEQYRSL                     | TKEDVKI                | IVETLTAKVRCYGF                      | GAVIEDFELRDCLQNV     | LGAKLYHGR----- 419   |                      |                  |
| Tstip | HDQYRHL                     | TKDDVKAIV              | DTLAKVRCYGF                         | GAVIEDFELRDCLQNV     | LGTLYHGR----- 409    |                      |                  |
|       | : : : * * .*****. : * * * : |                        |                                     |                      |                      |                      |                  |

|              |                           |            |
|--------------|---------------------------|------------|
| Trees        | -----                     |            |
| Tvire        | -----                     |            |
| Tatro        | -----                     |            |
| Vdahl        | -----                     |            |
| Moryz        | GGGR-----                 | 380        |
| Tterr        | -----                     |            |
| Ncras        | -----                     |            |
| Ntetr        | -----                     |            |
| Ndisc        | -----                     |            |
| Foxys        | -----                     |            |
| Fvert        | -----                     |            |
| Fgram        | -----                     |            |
| Sscl         | -----                     |            |
| Ptrit        | -----                     |            |
| Snodo        | -----                     |            |
| Chete        | -----                     |            |
| Mfiji        | AAQQISVH-----             | 368        |
| Mgram        | -----                     |            |
| Abenh        | SSLISPPIQSADVLDMYS        | 384        |
| Tvrr         | SSLISPPIQSADVLDMYS        | 409        |
| Trubr        | SSLISPPIQSADVLDMYS        | 429        |
| Ttons        | SSLISPPIQSADVLDMYS        | 429        |
| Mgyys        | SSLISPPIQSSEVLDMYS        | 446        |
| Mcani        | SSLISPPIQSAEVLDMYS        | 417        |
| Cimmi        | -YLPFRPAHVAEDYTMYS        | 434        |
| Cposa        | -YLAFRPAHVAEDYTMYS        | 434        |
| Pb-01        | KPLPPIL-----              | 408        |
| Pb-03        | KPLPPIL-----              | 410        |
| Aderm        | ASLPATPRQRLSDDLmys        | 424        |
| Afumi        | -----FSCAGDDTMYS          | 420        |
| Nfisc        | -----FSCAGDDTMYS          | 391        |
| Aclav        | -----MSLAADD----          | 397        |
| Aflav        | -----FSRAGDDTLYS          | 427        |
| Aoryz        | -----FSRAGDDTLYS          | 427        |
| Anige        | -----LHPGDEMmys           | 420        |
| Aterr        | -----FSRSEDHMLYS          | 434        |
| <b>Anidu</b> | <b>----GVAFSRHADETMYS</b> | <b>426</b> |
| Pchry        | -----MSGTADDSMYG          | 410        |
| Pmarn        | -----PPSRIGDDALYR         | 431        |
| Tstip        | -----PPSKVGDDALYR         | 421        |
