# Supplementary material for: Elucidation of Functional Markers from Aspergillus nidulans Developmental Regulator FlbB and Their Phylogenetic Distribution
Source: PubMed Central journal article supplement (PMC3053368; doi:10.1371/journal.pone.0017505), 2011-03-10
Supplement: pone.0017505.s002.pdf [file pone.0017505.s002.pdf]

E3

|              |                                                              |     |
|--------------|--------------------------------------------------------------|-----|
| Ncras        | KGSEEQRTQWPKRKESLGVLRGHGSEGTTGKGMGTMGKEMGKGMGKEKREITA-IPVGS- | 161 |
| Ntetr        | ----EQRTQWPKRKESLGVLRGHGSEGTTGKGMGTMGKEMGKGMGKEKREITA-IPVGS- | 158 |
| Ndisc        | SGNEEPMRQWPKRKESLGVLRGHGSEEGKGKVMQMKGKGTMGKGT-TGKGEITANIHVGS | 172 |
| Foxys        | -----                                                        |     |
| Fvert        | -----                                                        |     |
| Fgram        | -----                                                        |     |
| Trees        | -----                                                        |     |
| Tvire        | -----                                                        |     |
| Tatro        | -----                                                        |     |
| Vdahl        | -----                                                        |     |
| Moryz        | -----                                                        |     |
| Tterr        | -----                                                        |     |
| Sscle        | -----                                                        |     |
| Nfisc        | -----                                                        |     |
| Afumi        | -----                                                        |     |
| Aclav        | -----                                                        |     |
| Anige        | -----                                                        |     |
| <b>Anidu</b> | -----                                                        |     |
| Aoryz        | -----                                                        |     |
| Aflav        | -----                                                        |     |
| Aterr        | -----                                                        |     |
| Pchry        | -----                                                        |     |
| Pmarn        | -----                                                        |     |
| Tstip        | -----                                                        |     |
| Cimmi        | -----                                                        |     |
| Cposa        | -----                                                        |     |
| Ttons        | -----                                                        |     |
| Trubr        | -----                                                        |     |
| Tverr        | -----                                                        |     |
| Abenh        | -----                                                        |     |
| Mgyps        | -----                                                        |     |
| Mcani        | -----                                                        |     |
| Pb-01        | -----                                                        |     |
| Pb-03        | -----                                                        |     |
| Aderm        | -----                                                        |     |
| Mfiji        | -----                                                        |     |
| Mgram        | -----                                                        |     |
| Ptrit        | -----                                                        |     |
| Chete        | -----                                                        |     |
| Snodo        | -----                                                        |     |

E3

|              |                                                               |     |
|--------------|---------------------------------------------------------------|-----|
| Ncras        | -----NRRSSISRTRTISRSPSLRRLPLQGVRTP--SRTRLQTTAAAAASAAT-----    | 206 |
| Ntetr        | -----NRRSSISRTRTISRSPSLRRLPLQGARTP--SRTRLQATAASAATAPT-----    | 203 |
| Ndisc        | NNNNNNNNNNNNRRRTISRSPSLRRLPLQGARTPSTSRTRQTATVAAAAAAITPTTPTTPA | 232 |
| Foxys        | -----AKNANIKKQFDHVDDDDHALPSTRVS-----                          | 93  |
| Fvert        | -----AKNANIKKQFDHVDDDDHALPSTRVS-----                          | 93  |
| Fgram        | -----AKNIKPKPKPDHVDDDDHDLPKSRVP-----                          | 94  |
| Trees        | ---QQKQATQDEKIAAHQDDDFSVPPSRVP-----                           | 100 |
| Tvire        | ---QQGQAKQEEKKIAHQDDNLTVPSSRVP-----                           | 95  |
| Tatro        | ---EEQPPPEQEEKKFVHQDDDLTVPPSRVP-----                          | 104 |
| Vdahl        | ---TGASKRRNGSQAHNDAADPFKPPPPVP-----                           | 102 |
| Moryz        | -----TRDDQKQPP-----                                           | 67  |
| Tterr        | ---GRSQSQSTAQSRSLSRAKRQQQPPSLPTS-----                         | 127 |
| Sscle        | ---PRESDYLPSSPSRSLTKKSNQSPASLK-----                           | 96  |
| Nfisc        | -----                                                         |     |
| Afumi        | -----                                                         |     |
| Aclav        | -----                                                         |     |
| Anige        | -----                                                         |     |
| <b>Anidu</b> | -----                                                         |     |
| Aoryz        | -----                                                         |     |
| Aflav        | -----                                                         |     |
| Aterr        | -----                                                         |     |
| Pchry        | -----                                                         |     |
| Pmarn        | -----                                                         |     |
| Tstip        | -----                                                         |     |
| Cimmi        | -----                                                         |     |
| Cposa        | -----                                                         |     |
| Ttons        | -----                                                         |     |
| Trubr        | -----                                                         |     |
| Tverr        | -----                                                         |     |
| Abenh        | -----                                                         |     |
| Mgyps        | -----                                                         |     |
| Mcani        | -----                                                         |     |
| Pb-01        | -----                                                         |     |
| Pb-03        | -----                                                         |     |
| Aderm        | -----                                                         |     |
| Mfiji        | -----                                                         |     |
| Mgram        | -----                                                         |     |
| Ptrit        | -----                                                         |     |
| Chete        | -----                                                         |     |
| Snodo        | -----                                                         |     |

E3

|              |                                                                  |          |
|--------------|------------------------------------------------------------------|----------|
| Ncras        | TPTTPTAPTAAPAPASTPALRTASTSGVSSAGKG - RKGKTTGNSSSSR - - - RSESHSP | 261      |
| Ntetr        | TPTAPTATTTTTAPASTPASRTTSALGVSSAGKG - RKGKTTGNSSSSRSSSSRRSASHSP   | 262      |
| Ndisc        | TPATTTTTTTTTASAPASSTRTTSTLGVPSGARGGRKGMGTGSSSSSNSS - - RSASHSP   | 290      |
| Foxys        | .....                                                            |          |
| Fvert        | .....                                                            |          |
| Fgram        | .....                                                            |          |
| Trees        | .....                                                            |          |
| Tvire        | .....                                                            |          |
| Tatro        | .....                                                            |          |
| Vdahl        | .....                                                            |          |
| Moryz        | .....                                                            |          |
| Tterr        | .....                                                            |          |
| Sscle        | .....                                                            | DDAS 131 |
| Nfisc        | .....                                                            |          |
| Afumi        | .....                                                            |          |
| Aclav        | .....                                                            |          |
| Anige        | .....                                                            |          |
| <b>Anidu</b> | .....                                                            |          |
| Aoryz        | .....                                                            |          |
| Aflav        | .....                                                            |          |
| Aterr        | .....                                                            |          |
| Pchry        | .....                                                            |          |
| Pmarn        | .....                                                            |          |
| Tstip        | .....                                                            |          |
| Cimmi        | .....                                                            |          |
| Cposa        | .....                                                            |          |
| Ttons        | .....                                                            |          |
| Trubr        | .....                                                            |          |
| Tverr        | .....                                                            |          |
| Abenh        | .....                                                            |          |
| Mgyps        | .....                                                            |          |
| Mcani        | .....                                                            |          |
| Pb-01        | .....                                                            |          |
| Pb-03        | .....                                                            |          |
| Aderm        | .....                                                            |          |
| Mfiji        | .....                                                            |          |
| Mgram        | .....                                                            |          |
| Ptrit        | .....                                                            |          |
| Chete        | .....                                                            |          |
| Snodo        | .....                                                            |          |

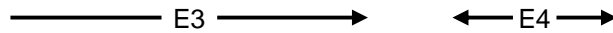

|              |                                                                         |            |
|--------------|-------------------------------------------------------------------------|------------|
| Ncras        | -NRKKDELSAQRWSAVKVL E EYDPNN - - - LDEVSRPYAYVADHVVVRVDGAADILAEVRRY     | 317        |
| Ntetr        | -NRKKDELSAQRWSAVKVL E EYDPNN - - - LDEVSRPYAYVADHVVVRVDGAADILAEVRRY     | 318        |
| Ndisc        | PNHKKDELSAQRWSAVKVL E EYDPNN - - - LDEVSRPYAYVADHVVVRVDGAADILAEVRRY     | 347        |
| Foxys        | - - DAEDAVLMHSWSPVKL L E EFDVDE - - MVTACRPYAYVADYVVVRV DLSVDVAGQMAKY   | 148        |
| Fvert        | - - DAEDAVLMHSWSPVKL L E EFDVDE - - MVTACRPYAYVADYVVVRV DLSVDVAGQMAKY   | 148        |
| Fgram        | - - DAEDAVLMHSWSPVRL L E EFDVDE - - MTMACRPYAYVADHVVRI DLSVDVAGEMAKY    | 149        |
| Trees        | - - YSEDSVLVNQFSVPVKL L E EYDPEE - - TSISARPFAYVADHVIRI DLSANVLEEMAKY   | 155        |
| Tvire        | - - DSEDSVLVNQTSAPVKL L E EHDPEE - - TSISARPFAYVADHVIRI DLSVNMLEEMARY   | 150        |
| Tatro        | - - DSEDSVLVNQTSAPVKL L E EHDPEE - - TTISARPYAYVADHVIRI DLSADVLQE IANY  | 159        |
| Vdahl        | - - PEEDDVLLNSWSAVK L L E EYDPTD - - LTSVSRPYAFVADHVVVRV DLSVSVVEEMAGY  | 157        |
| Moryz        | - - AATDSASSQAWSAIRL L E EYDPSM - - LGEAARPHAYVADHVVVRV DLSASVVD E MARY | 122        |
| Tterr        | SVVSEDDFSAQAWSAIKL L E EYDPRD - - LTAVSRPYAYVADYAA RIDLSCSIVDEIARY      | 188        |
| Sscle        | - - - SPSPNDKPSLTLKKITSHRNKN - - SFESEALHSRSASGSTNPNSGGPQAKEMEKS        | 150        |
| Nfisc        | ..... LQFIEQYDPED TDSATAVSQPYAYVAAKVITLSEPGAK - - APGLS                 | 105        |
| Afumi        | ..... LQFIEQYDPED TDSATAVSQPYAYVAAKVITLSEPGAK - - APGLS                 | 105        |
| Aclav        | ..... LRFIEQYDPED TTSEMAVSQPYAYVAAKVITLSEPGAR - - APALS                 | 105        |
| Anige        | ..... LRFIEQYDPED - TSDDAVSKPYAYVGGKVISIPEVDGP - - TPETS                | 104        |
| <b>Anidu</b> | ..... <b>LRFIEQYDPED - ESDEAVSKPYAYVAAKTISIPEAGSP - - NAGSS</b>         | <b>104</b> |
| Aoryz        | ..... LRFIEQYDPDD - TSDEAVSKPYAYVAAKVITMPESG - - - - ALS                | 100        |
| Aflav        | ..... LRFIEQYDPDD - TSDEAVSKPYAYVAAKVITMPESG - - - - ALS                | 100        |
| Aterr        | ..... LRFIEQYDPDD TTSETAVSKPFAYVAGKVLTMPDMTSA - - GMSLG                 | 105        |
| Pchry        | ..... LSFIEQYDPAD - ETSGTVSQDHAYVSTRVLEIPEDGSD - - GGGGA                | 104        |
| Pmarn        | ..... LQLIEQYDPLD - MTDAAVSQPHAFVADSVTILPDTARP - - VRGLS                | 104        |
| Tstip        | ..... LQLIEQYDPLD - MTDAAVSQPYAFVADNVTVLPDTARP - - VQGLS                | 104        |
| Cimmi        | ..... LRIIEQYDPDD - IGDALRQPYAFVAAKVITMPDEGRP - - GQMLS                 | 107        |
| Cposa        | ..... LRIIEQYDPDD - IGDALRQPYAFVAAKVITMPDEGRP - - GQMLS                 | 107        |
| Ttons        | ..... LALIEQYDPED - TRTSALSQPYAFVCSKVVPIDGSEPQFNFFLS                    | 109        |
| Trubr        | ..... LALIEQYDPED - TRTSALSQPYAFVCSKVVPIDGSEPQFNFFLS                    | 109        |
| Tverr        | ..... LALIEQYDSED - TSISALSQPYAFVCSKVVPIDGSEPQFNFFLS                    | 109        |
| Abenh        | ..... LALIEQYDPED - TRISALSQPYAFVCSKVVPIDGSEPQFNFFLS                    | 109        |
| Mgyps        | ..... LALIEQYDPED - TRTSTLCQPYAFVCSKVVPIDGSEPQFNFFLS                    | 109        |
| Mcani        | ..... LALIEQYDPPD - TRTSTLCQPYAFVCAKVVPIDGSSAPQFTSFLS                   | 109        |
| Pb-01        | ..... LQLIEQYDPDD - LGADAVSQPYAYVSAKTLTMG - - AKALSRAGLG                | 107        |
| Pb-03        | ..... LQLIEQYDPPD - LSADAVSQPYAYVSAKTLTMG - - AKALSRTGLG                | 107        |
| Aderm        | ..... LQLIEQYDPED - LSPDAVSQPYAYVAAKTMTMG - - AEALSGAGLG                | 107        |
| Mfiji        | ..... LRFVEQYDPND - ISSASSQPYAYVADICEEVK - - - - -                      | 91         |
| Mgram        | ..... LRFVEQYDPND - MSS - - LSQPYAYVADIVEEVK - - - - -                  | 89         |
| Ptrit        | ..... LRFIEQYDPPD - LTAK - - DQPYAYVCDIVQEIK - - - - -                  | 89         |
| Chete        | ..... LQFIEQYDPPD - FTVK - - DQPHAYVCDIVHEIK - - - - -                  | 89         |
| Snodo        | ..... LRFIEQYDPED - LTVK - - DQPYAYVCDQVHEIK - - - - -                  | 89         |

|              |                                                              |            |
|--------------|--------------------------------------------------------------|------------|
|              |                                                              | ←          |
| Ncras        | EERMQLRLKLGAEERTGERDPKANRNSGGSGGSSEYHDALEHLEESAKEKE - ETWIEQ | 376        |
| Ntetr        | EERMQLRLKLGAEKAGERNPKANRNSGGSGGSSEYHDALEHLEESAKEKD - ETWIEQ  | 377        |
| Ndisc        | EERMQ-QQQRKKGEEKLGKRDNKANRNSGGSGGSVEFHDALEHLEEGAKEKDMTWIEQ   | 406        |
| Foxys        | YDKMAG - - - - - EDGWIMK                                     | 161        |
| Fvert        | YDRMAG - - - - - EDGWIJK                                     | 161        |
| Fgram        | YERMAG - - - - - EDGWIVK                                     | 162        |
| Trees        | EALVKER - - - - - NEGNWFER                                   | 170        |
| Tvire        | EALVKER - - - - - NEGNWLER                                   | 165        |
| Tatro        | DALVKER - - - - - NEGNWFER                                   | 174        |
| Vdahl        | EERMGRDSAGGRAMT - - - - - AASSDDFNNGKAGHKKGATSGKKAGWLEK      | 201        |
| Moryz        | QARLKESGAMGGP - - - - - HSDETGRRQRAAKDRKAGWLEK               | 157        |
| Tterr        | EQQQLQSARP - - - - - AISIPSRNAPAEQPGWFEE                     | 217        |
| Sscl         | LRFNQWS - - - - - VIKLLEQ                                    | 164        |
| Nfisc        | WNPEDLAKDSP - - - - - LEPSAMEALTO                            | 127        |
| Afumi        | WNPEDLAKDSP - - - - - LEPSEMEALTO                            | 127        |
| Aclav        | WNPEDLAKDSP - - - - - LDPAAL EALTK                           | 127        |
| Anige        | WKPEDIFKEEP - - - - - LEKDAMEALTE                            | 126        |
| <b>Anidu</b> | <b>WN-TDIFQENP</b> - - - - - <b>LDPASSEALAK</b>              | <b>125</b> |
| Aoryz        | LDAEELVKESG - - - - - LDENAMAALTE                            | 122        |
| Aflav        | LDAEELVKESG - - - - - LDENAMAALTE                            | 122        |
| Aterr        | LDAEELVKKSG - - - - - LDQDAMDALTE                            | 127        |
| Pchry        | NIEDCVEQSG - - - - - LTDDQTAALTE                             | 126        |
| Pmarn        | MEIDQKFLDDA - - - - - IPPEARDTLAE                            | 126        |
| Tstip        | MNIDQRPLDDV - - - - - ILSDAHTALAE                            | 126        |
| Cimmi        | LNIGETIEKGPE - - - - - LSPGGPEALRR                           | 130        |
| Cposa        | LNIGETIEKGPE - - - - - LSPGGPEALRR                           | 130        |
| Ttons        | LDLEDFISKGGP - - - - - LSAAELATFAN                           | 132        |
| Trubr        | LDLEDFISKGGP - - - - - LSAAELATFAN                           | 132        |
| Tverr        | LDLEDFISKGGP - - - - - LSAAELATFAN                           | 132        |
| Abenh        | LDLEDFISKGGP - - - - - LSAAELATFTN                           | 132        |
| Mgyps        | LDLEDFISKGGP - - - - - LSAAELATFAN                           | 132        |
| Mcani        | LDLEEFISKGGP - - - - - LSSEALATFST                           | 132        |
| Pb-01        | LSLQEIQAQDPG - - - - - LSTAGTEVFVK                           | 130        |
| Pb-03        | LSLQEIQLDPG - - - - - LSTAGTEVFVK                            | 130        |
| Aderm        | LRVQEILQDPG - - - - - LSTAGSEVFRK                            | 130        |
| Mfiji        | LGIDIDEFRAG - - - - - VGNEQWSALCE                            | 114        |
| Mgram        | LGLDVDEVRGKE - - - - - VSDEQTKALAA                           | 112        |
| Ptrit        | LGEIVDEVRGAG - - - - - LGEEQWAAIAE                           | 112        |
| Chete        | LGVDIIEVQGAE - - - - - IADGQRAAITE                           | 112        |
| Snod         | TGVDFDELRRGG - - - - - LGEDQWAAIAD                           | 112        |

|              |                                                                   |            |
|--------------|-------------------------------------------------------------------|------------|
|              |                                                                   |            |
| Ncras        | LRDELQRGEEIKWYVVVNGDEERNYSNPSSDDEDEDEDEDE - - YEYDDSEELSSSEITS    | 434        |
| Ntetr        | LRDELQRGEEIKWYVVVNGDEERNYSNPSSDDEDEDEDEDEDEYDYDDSEELSSSEITS       | 437        |
| Ndisc        | LRDELQRGEEIKWYVVVNGDEERDYSNPSSDDEDEDE - EDEDE - - - YDSEDLSSEIN - | 460        |
| Foxys        | LRNELQKGEVPRWYVVVCGDDVREVPGKSDEEEKEVGYEQIRDAAQTMVRNRRTKDALEG      | 221        |
| Fvert        | LRNELQKGEVSRWYVVVCGDDVREVPGKSDEEEKEVGYEQIRDAAQTMVRNRRTKDALEG      | 221        |
| Fgram        | LRDQLQKGEVVKWYVVVCGDEVREVPGKSDEEEKEVGYEQIRDAAQTMVRNRRTKDALEG      | 222        |
| Trees        | LRDELQPGSPIEWYVVVNGDEERGWDHGGGGGEGEEDVEM                          | 211        |
| Tvire        | LRDELQQGAPIEWYVVVNGDEERCVPQDDDEESFES - - - - - EMREI              | 206        |
| Tatro        | LRDELQAGASIGWYVVVNGDEERAVPEYDDEDEES - - - - - DATE -              | 214        |
| Vdahl        | LRDQLQKGEDIRWYVVVCGDEERAVCEELLEAPREQ - - - - - L                  | 238        |
| Moryz        | LRDQLQRGEEIRWYVVVNGDEERGWDHGGGGGEGEEDVDF - - - - - DGQ -          | 202        |
| Tterr        | LRDQLQRGEEIRWYVVVNGDEVDRWSHEPSDRGVSSEPSAAGYPQPPSLHRQQDQNY         | 277        |
| Sscl         | YDPDDLKTASQPWAYVSDYIVEVGLGVSISEEVKYYK - - - - -                   | 201        |
| Nfisc        | <b>LRDKYAAGERIGWYVVVNGDPERWFPHSEEDSY-DEYDDEEDD - - - - -</b>      | <b>171</b> |
| Afumi        | <b>LRDKYAAGERIGWYVVVNGDPERWFPHYEEDSY-DEYDDEEDD - - - - -</b>      | <b>171</b> |
| Aclav        | <b>FRDKYAAGERIGWYVVVNGDPERWYPHSEGEDSYGEDYDDEEDD - - - - -</b>     | <b>173</b> |
| Anige        | <b>FRDKYAAGERIGWYVVVNGDPERWFPHDEEDGDSFDDGYDEEGSYA - - - - -</b>   | <b>173</b> |
| <b>Anidu</b> | <b>FRDKYAAGERIGWYVVVNGDPERWFPHDEDEDEGMEDDGYDD - - - - -</b>       | <b>167</b> |
| Aoryz        | MRDKYAAGEKIGWYVVVNGDPERWFPQIDEDD - - - - - ESMYDDE -              | 163        |
| Aflav        | MRDKYAAGEKIGWYVVVNGDPERWFPQIDEDD - - - - - ESMYDDE -              | 163        |
| Aterr        | <b>FRDKYAAGEKIGWYVVVNGDPERWFPQVEEEEE - - - - - EDESLMDE -</b>     | <b>168</b> |
| Pchry        | <b>LRDLAPGEKIGWYVVVNGDPERWYDPSEDEEYSEEDSVDESQTRRQ - - - - -</b>   | <b>175</b> |
| Pmarn        | IRDAIAPGAKIGWYVVVNGDPERWYPMEDDDELIEDTEDGAGGN - - - - -            | 171        |
| Tstip        | IRDAIAPGQKIGWYVVVNGDPERWYPMEDD - - - - - LMED - ED -              | 163        |
| Cimmi        | LRDFLAPEENIGWYVVVNGDPERAFPKSDEGDSATED - - - - -                   | 167        |
| Cposa        | LRDFLAPEENIGWYVVVNGDPERAFPKSDEGDSATED - - - - -                   | 167        |
| Ttons        | LREVLAPGEKIGWYVVVNGDPERAFPKSDEGDSATED - - - - -                   | 168        |
| Trubr        | LREALAPGEKIRWYVVVNGDPERAFPKSDEGDSATED - - - - -                   | 169        |
| Tverr        | LREVLAPGEKIGWYVVVNGDPERAFPKSDEGDSATED - - - - -                   | 169        |
| Abenh        | LREVLAPGEKIGWYVVVNGDPERAFPKSDEGDSATED - - - - -                   | 169        |
| Mgyps        | LREVLAPGEKIGWYVVVNGDPERAFPKSDEGDSATED - - - - -                   | 169        |
| Mcani        | LRDVLGPGEKIGWYVVVNGDPERAFSAATEEELHIES - - - - -                   | 169        |
| Pb-01        | LKDELAPASEIGWYVVVNGDPERAFYESSDESSESSVED - - - - -                 | 167        |
| Pb-03        | LKDELAPASEIGWYVVVNGDPERAFYESSDESSESSVAED - - - - -                | 167        |
| Aderm        | LRNELAPDAEIGWYVVVNGDPERAFSEDSDESPVDDG - - - - -                   | 167        |
| Mfiji        | LRDKIAPEEKVWYVVVCGDEDWAPVTG - - - - - LLQSGGH -                   | 151        |
| Mgram        | VRDKLAPVPGWYVVVCGDEERLAPGNEDE - - - - - AEEAVEAGQV -              | 154        |
| Ptrit        | LRDKVAPGEKLGWYVVVNGDVERWAPALE - - - - - DDDTTPDASQFG -            | 153        |
| Chete        | LRDKVAPGEKLGWYVVVNGDVERWAPALE - - - - - DDDATPEASILS -            | 153        |
| Snod         | LRDKVAPGEKLGWYVVVNGDVERWAPALESEGEDTETATNSPFS - - - - -            | 157        |

\* :



|              |                                                              |     |
|--------------|--------------------------------------------------------------|-----|
| Ncras        | -STTPTPTSTTTMATS-TRG-TTPTAGQAPPPPPPTAMS-MRNTGPIIKEGAARRVV    | 601 |
| Ntetr        | -STAPTPTPTSTTTMATS-TRG-TTPTAGQAPPPP--PTAMS-MRNTGPIIKEGAARRVV | 602 |
| Ndisc        | RSTGSTPTPTTTTATTNTRGGTSPTTAPAPAPAPPPTAMPAMRNTRAIKEGAARRVV    | 639 |
| Foxys        | ALETDPVEMPLLHPDNTRYASTASEIYSAYQSRIEPEEFAKIQSSVQDPMRGEIPDVK   | 401 |
| Fvert        | ALETSDVEIPLLHPDNTRYSVSTASEIYSAYQSRIEPEEFDHSSVQDPIRGEIPNVK    | 401 |
| Fgram        | --ETPDADMRLRQSEITQYSASTTSGLHSENGRTRLEPEEFAKAQPPTQNFVREETPDVV | 391 |
| Trees        | -----                                                        |     |
| Tvire        | -----                                                        |     |
| Tatro        | -----                                                        |     |
| Vdahl        | -----                                                        |     |
| Moryz        | -----                                                        |     |
| Tterr        | -----                                                        |     |
| Sscle        | -----                                                        |     |
| Nfisc        | -----                                                        |     |
| Afumi        | -----                                                        |     |
| Aclav        | -----                                                        |     |
| Anige        | -----                                                        |     |
| <b>Anidu</b> | -----                                                        |     |
| Aoryz        | -----                                                        |     |
| Aflav        | -----                                                        |     |
| Aterr        | -----                                                        |     |
| Pchry        | YTGL-----                                                    | 280 |
| Pmarn        | -----                                                        |     |
| Tstip        | -----                                                        |     |
| Cimmi        | -----                                                        |     |
| Cposa        | -----                                                        |     |
| Ttons        | -----                                                        |     |
| Trubr        | -----                                                        |     |
| Tverr        | -----                                                        |     |
| Abenh        | -----                                                        |     |
| Mgygs        | -----                                                        |     |
| Mcani        | -----                                                        |     |
| Pb-01        | -----                                                        |     |
| Pb-03        | -----                                                        |     |
| Aderm        | -----                                                        |     |
| Mfiji        | -----                                                        |     |
| Mgram        | -----                                                        |     |
| Ptrit        | NAS-----                                                     | 238 |
| Chete        | AAP-----                                                     | 237 |
| Snodo        | ISRG-----                                                    | 242 |

|              |                                                              |     |
|--------------|--------------------------------------------------------------|-----|
| Ncras        | SEGEIHPALRGQARRSEIPIIMVTPTRSTFPDETETETAGAVGEKRMVEQPQQPQPQQ   | 661 |
| Ntetr        | SEGEIHPALRGQARKSEIPIIMVTPTRSTFPDETETETAGAVGERRMVEQPQQPQPQPS  | 662 |
| Ndisc        | SEEEIHPALRGVQQNPEIPIIMVTPTRSTFP--TETGMAGAAGERRMAEQQQQQQQQQQ  | 697 |
| Foxys        | QPLKPNELHPSRSSTPPTPKPLQRQLPAPTIYRPESFIPPFSPVLPPMEGFDQESPRLNT | 461 |
| Fvert        | QPLKPNKLHPSRSSTPPTPKPLQRQRPVPTIYRPESFVPPFSPVLPPMDGFEEVSPRPNT | 461 |
| Fgram        | QPLKLAELVSSRTSTLPTPKNSQRKLPAPSLYRPESFIPPFSPPLPSSETFPDEAPKSTV | 451 |
| Trees        | -----                                                        |     |
| Tvire        | -----                                                        |     |
| Tatro        | -----                                                        |     |
| Vdahl        | -----VPPAPTREPPPAREQRPATAHPQPVMEISNVG-----                   | 362 |
| Moryz        | -----GPSDNGMQPLS-----                                        | 259 |
| Tterr        | SLPRRDLGLRERQREKEKDMANEEQPRPLFIGPGKGMTNTRITTTTTTTPTKKTITTT   | 453 |
| Sscle        | -----                                                        |     |
| Nfisc        | -----                                                        |     |
| Afumi        | -----                                                        |     |
| Aclav        | -----                                                        |     |
| Anige        | -----                                                        |     |
| <b>Anidu</b> | -----                                                        |     |
| Aoryz        | -----                                                        |     |
| Aflav        | -----                                                        |     |
| Aterr        | -----                                                        |     |
| Pchry        | -----                                                        |     |
| Pmarn        | -----                                                        |     |
| Tstip        | -----                                                        |     |
| Cimmi        | -----                                                        |     |
| Cposa        | -----                                                        |     |
| Ttons        | -----                                                        |     |
| Trubr        | -----                                                        |     |
| Tverr        | -----                                                        |     |
| Abenh        | -----                                                        |     |
| Mgygs        | -----                                                        |     |
| Mcani        | -----                                                        |     |
| Pb-01        | -----                                                        |     |
| Pb-03        | -----                                                        |     |
| Aderm        | -----                                                        |     |
| Mfiji        | -----                                                        |     |
| Mgram        | -----                                                        |     |
| Ptrit        | -----                                                        |     |
| Chete        | -----                                                        |     |
| Snodo        | -----                                                        |     |

|              |                                                               |     |
|--------------|---------------------------------------------------------------|-----|
| Ncras        | QQHQHHQQQQPQQPQPQHPQPHQ-----HHQINETEPGPRRGSTASANPDMGT         | 710 |
| Ntetr        | QQQQHHQQQQPQQPQPQPPQQPQQ-----HHQINETEPGPRRASTASANPDMGI        | 711 |
| Ndisc        | QQQQQQQQQQQQQQQQQQQQQQQQQQQQQQQQQQQQQQQRDEIEPETSRRGSSASN-TMGI | 756 |
| Foxys        | PSRTENVKPPETSWPLSSDSPLESSGSSTFHNQDAPYPYVTSIINPKDRPGTYLNVPKEL  | 521 |
| Fvert        | PSRAENVKPPETSWPLSSDSPLESSGSSTFHNQDTPYPYVTSIMSPKDSLSTYLNVPKEL  | 521 |
| Fgram        | PNKTGATKPTHEHPWPLSSDSPLGSSGSSTYHNEENSFPLVSSPAHSKNPPAATFSLPKEI | 511 |
| Trees        | -----                                                         |     |
| Tvire        | -----                                                         |     |
| Tatro        | -----                                                         |     |
| Vdahl        | -----VKTPHKSRSLRRLFGMKEGSS-----                               | 383 |
| Moryz        | -----VMPPQDVASKPTT-----KGTGS---GFRRLF                         | 283 |
| Tterr        | PGGDRPPMVPEKDYPFRPPAGNANTLAHAGPLRPKKSVDAGAGGRPKPSGSKTGGLRRLF  | 513 |
| Sscle        | -----                                                         |     |
| Nfisc        | -----                                                         |     |
| Afumi        | -----                                                         |     |
| Aclav        | -----                                                         |     |
| Anige        | -----                                                         |     |
| <b>Anidu</b> | -----                                                         |     |
| Aoryz        | -----                                                         |     |
| Aflav        | -----                                                         |     |
| Aterr        | -----                                                         |     |
| Pchry        | -----                                                         |     |
| Pmarn        | -----                                                         |     |
| Tstip        | -----                                                         |     |
| Cimmi        | -----                                                         |     |
| Cposa        | -----                                                         |     |
| Ttons        | -----                                                         |     |
| Trubr        | -----                                                         |     |
| Tverr        | -----                                                         |     |
| Abenh        | -----                                                         |     |
| Mgyps        | -----                                                         |     |
| Mcani        | -----                                                         |     |
| Pb-01        | -----                                                         |     |
| Pb-03        | -----                                                         |     |
| Aderm        | -----                                                         |     |
| Mfiji        | -----                                                         |     |
| Mgram        | -----                                                         |     |
| Ptrit        | -----                                                         |     |
| Chete        | -----                                                         |     |
| Snodo        | -----                                                         |     |

|              |                                                               |     |
|--------------|---------------------------------------------------------------|-----|
| Ncras        | ITSTTVPLTSSFSLDTSPSNAPTPTTIP-ALSLKPLKPPKKQSTLP---TLPTISTSSL   | 765 |
| Ntetr        | ITSTTVPLTSSFSLDTSPSNAPTPTTIPTGLTLKPLKPPKKNSTLPTIIPPTIPTISTASL | 771 |
| Ndisc        | IT-TTVPLTSSFSLDTSPSNVPTPTTIPLNLSLKTLPKPLK--APKP-----PKRHLSNP  | 807 |
| Foxys        | VPPRTPSPTSEYSPQSQNFSGNMPKFEGIVPHAPLLVSPNPARLE-----QPSSGI      | 573 |
| Fvert        | VPPRTPSPTSEYSPQSQNFSGNMPKFEGIVSHAPLLVSPNPARLE-----QPSSGI      | 573 |
| Fgram        | TPPRIPSPASKYPLQPQFPGPTMSRFEESVLQASPLLVTNPKRLE-----KPSSGV      | 563 |
| Trees        | -----                                                         |     |
| Tvire        | -----                                                         |     |
| Tatro        | -----                                                         |     |
| Vdahl        | -----                                                         |     |
| Moryz        | GKGSKSSGDLK-----                                              | 294 |
| Tterr        | GRAKADVYAP-----                                               | 524 |
| Sscle        | -----                                                         |     |
| Nfisc        | -----                                                         |     |
| Afumi        | -----                                                         |     |
| Aclav        | -----                                                         |     |
| Anige        | -----                                                         |     |
| <b>Anidu</b> | -----                                                         |     |
| Aoryz        | -----                                                         |     |
| Aflav        | -----                                                         |     |
| Aterr        | -----                                                         |     |
| Pchry        | -----                                                         |     |
| Pmarn        | -----                                                         |     |
| Tstip        | -----                                                         |     |
| Cimmi        | -----                                                         |     |
| Cposa        | -----                                                         |     |
| Ttons        | -----                                                         |     |
| Trubr        | -----                                                         |     |
| Tverr        | -----                                                         |     |
| Abenh        | -----                                                         |     |
| Mgyps        | -----                                                         |     |
| Mcani        | -----                                                         |     |
| Pb-01        | -----                                                         |     |
| Pb-03        | -----                                                         |     |
| Aderm        | -----                                                         |     |
| Mfiji        | -----                                                         |     |
| Mgram        | -----                                                         |     |
| Ptrit        | -----                                                         |     |
| Chete        | -----                                                         |     |
| Snodo        | -----                                                         |     |

|              |                                                                    |     |
|--------------|--------------------------------------------------------------------|-----|
| Ncras        | VRNRGNRHSSNTNTGSKRSSLTTLRSPSSWSCLSLHL - - - GSHS - HSTSPKDKDGEDIT  | 821 |
| Ntetr        | VRNRGNRHSSNTGTGSKRSSLTTLRSPSSWSCLSLHL - - - GSHSHSTSPK - - DGGDTT  | 826 |
| Ndisc        | LSSIS - - TTTTTTTTNNKRSSLTSLRSPSSWSCLSLNLNLGHHHSTTNNPKDKDREEIN     | 865 |
| Foxys        | LYEAGDTISEQQLPSTPMPNAKQVALPNLDTKAA - - - KELVSKPSASATTPTSAHQKTIN   | 630 |
| Fvert        | LYEAGDTISEQRLSSTPMPKTKQVALPNLDTKAA - - - KEPASKP - PSATTPTSAHRKTIN | 629 |
| Fgram        | VYQAGESIPKKQPPSSLPRSSVVRAPPPLNINTANSIKRSTSNPAKNITPPTSAQRETTD       | 623 |
| Trees        | -----                                                              |     |
| Tvire        | -----                                                              |     |
| Tatro        | -----                                                              |     |
| Vdahl        | -----                                                              |     |
| Moryz        | -----                                                              |     |
| Tterr        | -----                                                              |     |
| Sscle        | -----                                                              |     |
| Nfisc        | -----                                                              |     |
| Afumi        | -----                                                              |     |
| Aclav        | -----                                                              |     |
| Anige        | -----                                                              |     |
| <b>Anidu</b> | -----                                                              |     |
| Aoryz        | -----                                                              |     |
| Aflav        | -----                                                              |     |
| Aterr        | -----                                                              |     |
| Pchry        | -----                                                              |     |
| Pmarn        | -----                                                              |     |
| Tstip        | -----                                                              |     |
| Cimmi        | -----                                                              |     |
| Cposa        | -----                                                              |     |
| Ttons        | -----                                                              |     |
| Trubr        | -----                                                              |     |
| Tverr        | -----                                                              |     |
| Abenh        | -----                                                              |     |
| Mgyps        | -----                                                              |     |
| Mcani        | -----                                                              |     |
| Pb-01        | -----                                                              |     |
| Pb-03        | -----                                                              |     |
| Aderm        | -----                                                              |     |
| Mfiji        | -----                                                              |     |
| Mgram        | -----                                                              |     |
| Ptrit        | -----                                                              |     |
| Chete        | -----                                                              |     |
| Snodo        | -----                                                              |     |

|              |                                                                        |     |
|--------------|------------------------------------------------------------------------|-----|
| Ncras        | GDDDEEVVLPPRPSPSPPIPIISVN - - PMG - - SYSYEPVSTLPPRPAPMPPNGSNNSNK      | 877 |
| Ntetr        | - - EMDEEVVLPPRPSPSPPIPIISLNLNPMGS - SYSYEPVSTLPPRPAPAPP - - - - - GSK | 878 |
| Ndisc        | - EEEEEEEAEDPPRPSPSPPIPLHHP - HPMGSSAYSYEPVSTLPPRPAPAPP - - - - - K    | 916 |
| Foxys        | PVLKTP - - - - - PRNPATQONTQKLPKSRLPRSVPKNIRISNVPLPPEPEIKTPRRPPTP      | 684 |
| Fvert        | PALRTP - - - - - PRNPATAQPTAQMSPKSRLPRSVPKNIRISNVPLPPEPEIKTPRRPPTP     | 683 |
| Fgram        | LNMKTPTPTPKTPTGQPLTQASPKSRIPRSGPKTIRVSTLPPPEPAVKSPVRPPTP               | 683 |
| Trees        | -----                                                                  |     |
| Tvire        | -----                                                                  |     |
| Tatro        | -----                                                                  |     |
| Vdahl        | -----                                                                  |     |
| Moryz        | -----                                                                  |     |
| Tterr        | -----                                                                  |     |
| Sscle        | -----                                                                  |     |
| Nfisc        | -----                                                                  |     |
| Afumi        | -----                                                                  |     |
| Aclav        | -----                                                                  |     |
| Anige        | -----                                                                  |     |
| <b>Anidu</b> | -----                                                                  |     |
| Aoryz        | -----                                                                  |     |
| Aflav        | -----                                                                  |     |
| Aterr        | -----                                                                  |     |
| Pchry        | -----                                                                  |     |
| Pmarn        | -----                                                                  |     |
| Tstip        | -----                                                                  |     |
| Cimmi        | -----                                                                  |     |
| Cposa        | -----                                                                  |     |
| Ttons        | -----                                                                  |     |
| Trubr        | -----                                                                  |     |
| Tverr        | -----                                                                  |     |
| Abenh        | -----                                                                  |     |
| Mgyps        | -----                                                                  |     |
| Mcani        | -----                                                                  |     |
| Pb-01        | -----                                                                  |     |
| Pb-03        | -----                                                                  |     |
| Aderm        | -----                                                                  |     |
| Mfiji        | -----                                                                  |     |
| Mgram        | -----                                                                  |     |
| Ptrit        | -----                                                                  |     |
| Chete        | -----                                                                  |     |
| Snodo        | -----                                                                  |     |





|              |                                      |      |
|--------------|--------------------------------------|------|
| Ncras        | KDGWI-----                           | 1001 |
| Ntetr        | KEGWI-----                           | 990  |
| Ndisc        | KEGWI-----                           | 1014 |
| Foxys        | EDGRHPKQRIGRSHSVAEGLKKLFRKPSHAKAGHHP | 832  |
| Fvert        | -----                                |      |
| Fgram        | EGGKHQKHHVARSHSVADGFKRLFRRPSLTKGSHH- | 836  |
| Trees        | -----                                |      |
| Tvire        | -----                                |      |
| Tatro        | -----                                |      |
| Vdahl        | -----                                |      |
| Moryz        | -----                                |      |
| Tterr        | -----                                |      |
| Sscle        | -----                                |      |
| Nfisc        | -----                                |      |
| Afumi        | -----                                |      |
| Aclav        | -----                                |      |
| Anige        | -----                                |      |
| <b>Anidu</b> | -----                                |      |
| Aoryz        | -----                                |      |
| Aflav        | -----                                |      |
| Aterr        | -----                                |      |
| Pchry        | -----                                |      |
| Pmarn        | -----                                |      |
| Tstip        | -----                                |      |
| Cimmi        | -----                                |      |
| Cposa        | -----                                |      |
| Ttons        | -----                                |      |
| Trubr        | -----                                |      |
| Tverr        | -----                                |      |
| Abenh        | -----                                |      |
| Mgyps        | -----                                |      |
| Mcani        | -----                                |      |
| Pb-01        | -----                                |      |
| Pb-03        | -----                                |      |
| Aderm        | -----                                |      |
| Mfiji        | -----                                |      |
| Mgram        | -----                                |      |
| Ptrit        | -----                                |      |
| Chete        | -----                                |      |
| Snodo        | -----                                |      |
